# Supplementary material
Source: PubMed Central journal article supplement (PMC3175618)

# Assessment of Quality Measures for Individual Genotypes

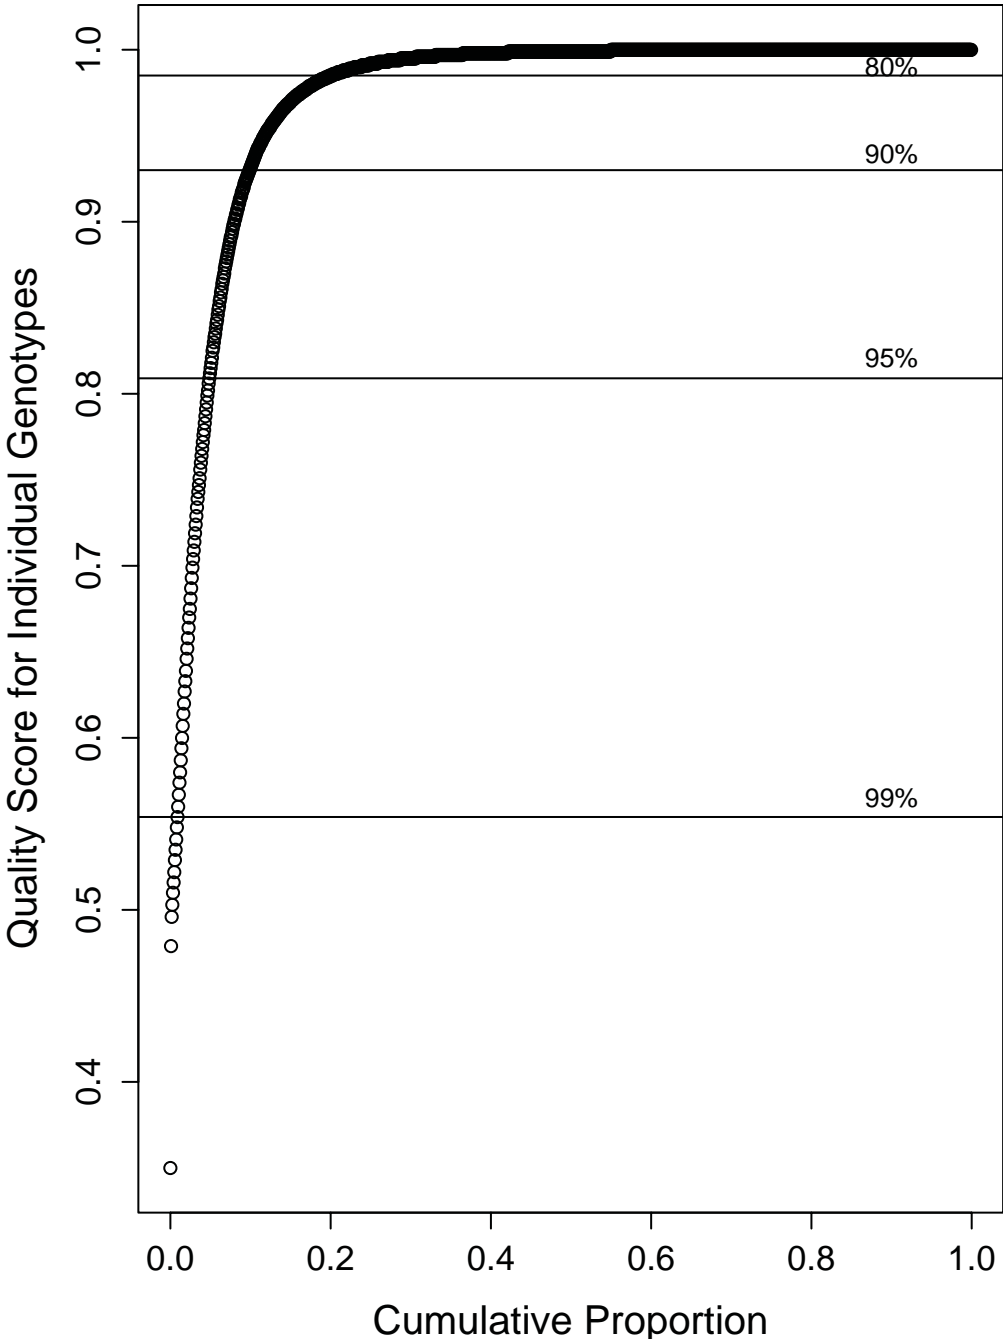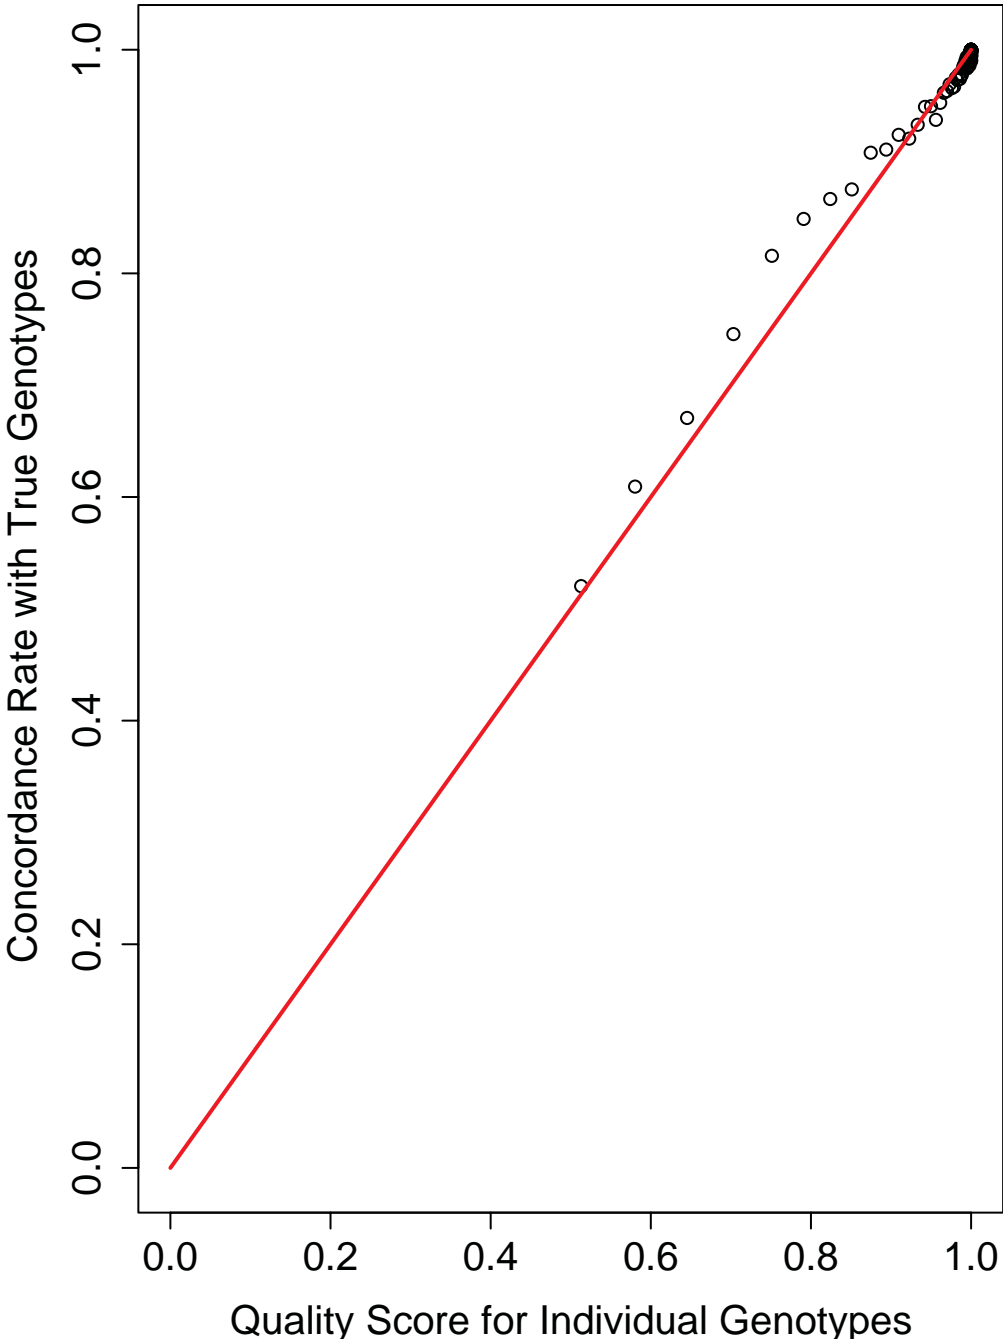

Supplement: NIHMS314089-supplement-SuppFig1.pdf [file NIHMS314089-supplement-SuppFig1.pdf]
